# Supplementary material
Source: PubMed Central journal article supplement (PMC3833303)
Supplement: Supp_Fig1.pdf [file Supp_Fig1.pdf]

## Supplementary Data

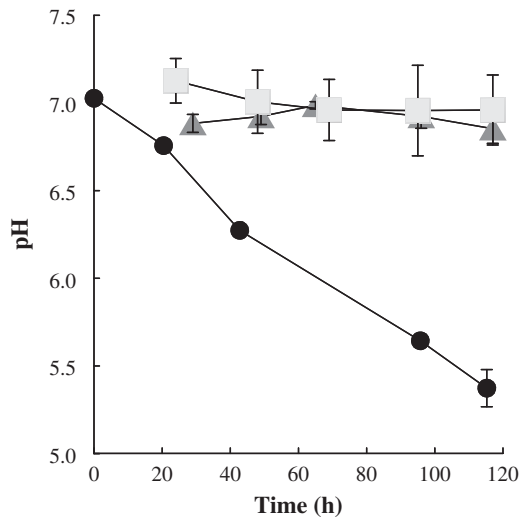

**SUPPLEMENTARY FIG. S1.** Effect of ammonium nitrate concentration on pH of batch incubations containing bioreactor-treated slurry. Symbols and error bars represent mean and standard deviations of triplicate incubations. Incubations were with buffer containing 5 mM NH<sub>4</sub>NO<sub>3</sub> (●), 2.5 mM NH<sub>4</sub>NO<sub>3</sub> (▲), or 1.0 mM NH<sub>4</sub>NO<sub>3</sub> (□).
