# Supplementary material
Source: PubMed Central journal article supplement (PMC3833303)
Supplement: Supp_Fig2.pdf [file Supp_Fig2.pdf]

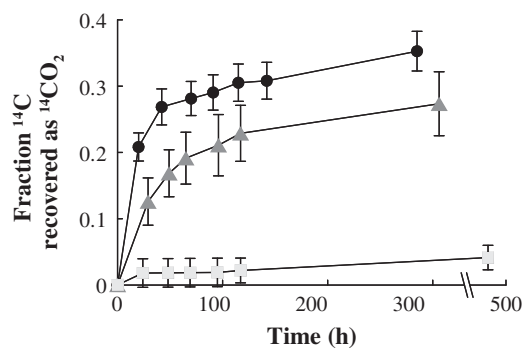

**SUPPLEMENTARY FIG. S2.** Effect of ammonium nitrate concentration on mineralization of  $^{14}\text{C}$ -anthracene in batch incubations containing bioreactor-treated slurry. Other notation as in Supplementary Fig. S1.
