# Supplementary material
Source: PubMed Central journal article supplement (PMC3833303)
Supplement: Supp_Fig3.pdf [file Supp_Fig3.pdf]

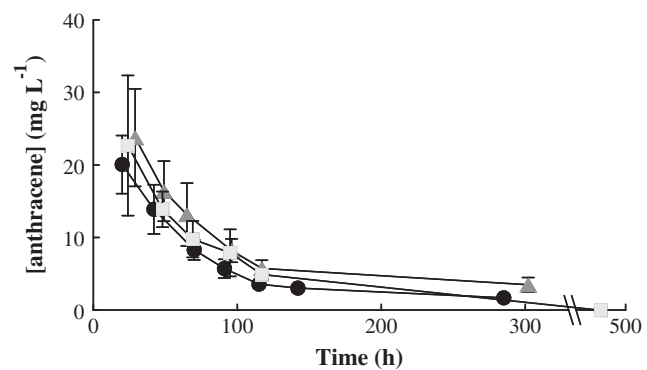

**SUPPLEMENTARY FIG. S3.** Effect of ammonium nitrate concentration on disappearance of unlabeled anthracene in batch incubations containing bioreactor-treated slurry. Symbols and error bars represent the mean and range of duplicate incubations. Other notation as in Supplementary Fig. S1.
