# Supplementary material
Source: PubMed Central journal article supplement (PMC3833303)
Supplement: Supp_Fig4.pdf [file Supp_Fig4.pdf]

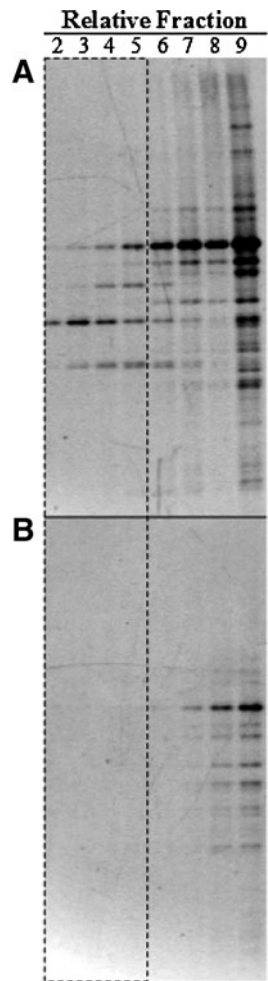

**SUPPLEMENTARY FIG. S4.** Color inverted denaturing gradient gel electrophoresis image of stable-isotope probing incubations containing either (A) [U-<sup>13</sup>C]anthracene or (B) unlabeled anthracene. Fractions identified as containing <sup>13</sup>C-enriched "heavy" DNA and pooled for construction of 16S rRNA gene clone libraries are denoted within dotted lines. Additional fractions containing unenriched DNA are not shown.
